# Supplementary material for: Microbial fungicides can positively affect aubergine photosynthetic properties, soil enzyme activity and microbial community structure
Source: PeerJ. 2024 Jun 28;12:e17620. doi: 10.7717/peerj.17620 (PMC11216198; doi:10.7717/peerj.17620)
Supplement: Supplemental Information 1 [file peerj-12-17620-s001.xls]

## Sheet: Sheet1
			AVERAGE	Ⅰ	Ⅱ	Ⅲ
		QZ-CK	40.107	39.8494	40.6591	39.8125
		QZ-T1	43.0097	43.0603	49.8837	36.0849
	Sucrase activity/mg·(g·d)	QZ-T2	67.1697	67.4138	57.4693	76.6261
		QZ-T3	41.6079	41.6894	51.6995	31.4347
		QZ-T4	45.4982	45.4838	56.2406	34.7701
		QZ-T5	53.8748	53.8274	44.8061	62.9907
		QZ-CK	11.5781	11.6894	12.0001	11.0446
		QZ-T1	13.8778	13.9123	14.7535	12.9677
	Alkaline phosphatase activity/mg·(g·d)	QZ-T2	13.6483	13.6217	14.197	13.1262
		QZ-T3	12.1058	12.21	12.3846	11.7227
		QZ-T4	13.9805	14.0465	14.7763	13.1187
		QZ-T5	14.8819	14.7427	15.5885	14.3145
		QZ-CK	53.9677	53.9352	54.0527	53.9151
		QZ-T1	57.6555	57.4992	58.4868	56.9806
		QZ-T2	58.6091	58.6938	59.3931	57.7404
	Catalase activity/mg·(g·d)	QZ-T3	53.9505	54.0309	54.1247	53.696
		QZ-T4	53.516	53.3841	54.2327	52.9312
		QZ-T5	55.8068	55.6743	56.1418	55.6042
		QZ-CK	205.173	195.197	205.557	214.764
		QZ-T1	294.39	294.282	304.717	284.172
		QZ-T2	300.4	300.317	311.313	289.571
	Urease activity/mg·(g·d)	QZ-T3	297.432	297.299	288.038	306.961
		QZ-T4	333.153	333.248	313.895	352.317
		QZ-T5	277.64	287.75	278.356	266.813
