# Supplementary material for: Microbial fungicides can positively affect aubergine photosynthetic properties, soil enzyme activity and microbial community structure
Source: PeerJ. 2024 Jun 28;12:e17620. doi: 10.7717/peerj.17620 (PMC11216198; doi:10.7717/peerj.17620)
Supplement: Supplemental Information 6 [file peerj-12-17620-s006.xlsx]

## Sheet: 物种细菌
OTU ID	Pro	Fir	Act	Chl	Aci	Bac	Myx	Gem	Ver	Nit
QZ_CK	8011	7041	3832	2278	1253	1198	911	752	170	420
QZ_T1	8201	5628	3030	3073	1781	1585	882	766	339	320
QZ_T2	7248	4938	3343	2535	3284	1804	782	625	673	324	bacteria
QZ_T3	6995	5702	3424	2559	2554	1045	907	857	556	485
QZ_T4	6288	6429	3105	3308	2680	1749	748	809	252	373
QZ_T5	6590	8538	3126	2389	1449	1524	904	733	265	275
	Sa	Pa	Ca	Ua
QZ-CK	4.0107	1.15781	5.39677	0.205173
QZ-T1	4.30097	1.38778	5.76555	0.29439
QZ-T2	6.71697	1.36483	5.86091	0.3004	environmental factor
QZ-T3	4.16079	1.21058	5.39505	0.297432
QZ-T4	4.54982	1.39805	5.3516	0.333153
QZ-T5	5.38748	1.48819	5.58068	0.27764
OTU ID	Asc	Mor	unc	Bas	Chy	Zoo	Roz	Olp	Muc	Kic
QZ_CK	31635	11855	1232	86	39	27	9	7	2	0.2
QZ_T1	39099	3738	1303	248	286	51	167	0.2	0.2	0.2
QZ_T2	29202	2871	11988	115	370	63	253	26	0.2	4
QZ_T3	25049	10965	6817	249	1425	368	9	0.2	10	0.2	fungi
QZ_T4	27407	7503	1574	8135	184	36	34	10	9	0.2
QZ_T5	35866	6407	1907	600	59	5	23	20	5	0.2
