# Supplementary material for: Microbial fungicides can positively affect aubergine photosynthetic properties, soil enzyme activity and microbial community structure
Source: PeerJ. 2024 Jun 28;12:e17620. doi: 10.7717/peerj.17620 (PMC11216198; doi:10.7717/peerj.17620)
Supplement: Supplemental Information 7 [file peerj-12-17620-s007.xlsx]

## Sheet: Sheet1
OTU ID	QZ_CK	QZ_T1	QZ_T2	QZ_T3	QZ_T4	QZ_T5
Mortierella	0.264078	0.0832665	0.0639312	0.244253	0.166733	0.142676
Lophotrichus	0.159004	0.366702	0.118306	0.0940925	0.0842466	0.118195
Chaetomium	0.0703466	0.234318	0.152923	0.0939143	0.15123	0.207654
g__unclassified_k__Fungi	0.0274436	0.0290252	0.267041	0.151853	0.0350619	0.0424797
Thermomyces	0.0153257	0.0749577	0.0889245	0.0267085	0.103693	0.0817518
Coprinellus	0.000846476	0.00490065	0.000356411	0.00218302	0.165709	0.00588078
Myceliophthora	0.00895482	0.0125635	0.0378018	0.014301	0.0502762	0.0498307
Aspergillus	0.0453756	0.0168404	0.0133431	0.0321884	0.0306513	0.0281119
Chrysosporium	0.0133209	0.00737325	0.00456652	0.0783436	0.0116502	0.0427248
Cladosporium	0.129199	0.000423238	0.0032968	0.00158157	0.00367549	0.00182661
others	0.266105	0.169629	0.24951	0.260581	0.197073	0.278869
