# Supplementary material for: Microbial fungicides can positively affect aubergine photosynthetic properties, soil enzyme activity and microbial community structure
Source: PeerJ. 2024 Jun 28;12:e17620. doi: 10.7717/peerj.17620 (PMC11216198; doi:10.7717/peerj.17620)
Supplement: Supplemental Information 8 [file peerj-12-17620-s008.xlsx]

## Sheet: Sheet1
#OTU ID	QZ_CK	QZ_T1	QZ_T2	QZ_T3	QZ_T4	QZ_T5
Bacillus	0.0803896	0.0416485	0.0597107	0.0703227	0.0629089	0.111644
g__Paenisporosarcina	0.0826065	0.0540776	0.0131196	0.0343437	0.0336895	0.0278383
g__norank_f__norank_o__Actinomarinales	0.0426661	0.0252217	0.0275113	0.0330353	0.0326719	0.0366332
g__norank_f__A4b	0.0117023	0.0309638	0.0145007	0.0208969	0.0236226	0.0180986
g__norank_f__Geminicoccaceae	0.0305277	0.0138828	0.013265	0.0170446	0.0170446	0.0218418
g__norank_f__norank_o__Vicinamibacterales	0.00828609	0.0138101	0.0303096	0.0180622	0.0248946	0.0106847
g__Chryseolinea	0.0172627	0.017081	0.0201337	0.0117023	0.0203155	0.0154092
g__norank_f__norank_o__norank_c__Alphaproteobacteria	0.0269298	0.0172263	0.0114115	0.0112298	0.0150458	0.0148277
g__norank_f__norank_o__norank_c__bacteriap25	0.0194796	0.0109027	0.0113752	0.0190435	0.0166812	0.0174807
Sphingomonas	0.0122474	0.0175534	0.0188981	0.0157	0.0120657	0.00886757
others	0.667902	0.757632	0.779765	0.748619	0.74106	0.716674
