# Supplementary material for: Microbial fungicides can positively affect aubergine photosynthetic properties, soil enzyme activity and microbial community structure
Source: PeerJ. 2024 Jun 28;12:e17620. doi: 10.7717/peerj.17620 (PMC11216198; doi:10.7717/peerj.17620)
Supplement: Supplemental Information 9 [file peerj-12-17620-s009.xls]

## Sheet: Sheet1
		A	gs	Ci	E
ck	1	23	0.19	470.1	8.96
	2	22.8	0.21	474.04	8.89
	3	22.6	0.2	465.96	8.93
T1	1	23.83	0.32	410.2	9.21
	2	23.97	0.33	421.2	9.17
	3	23.92	0.35	395.5	8.92
T2	1	26.12	0.38	406.28	9.34
	2	26.09	0.4	413.23	9.41
	3	26.14	0.34	402.6	9.35
T3	1	24.06	0.27	430.4	9.2
	2	24.1	0.26	422.5	9.16
	3	24.05	0.32	442.5	9.26
T4	1	24	0.35	420.4	9.26
	2	24.05	0.283	426.04	9.33
	3	23.89	0.264	409.8	9.16
T5	1	26	0.32	400.1	9.3
	2	26.12	0.37	410.8	9.24
	3	25.8	0.39	415.1	9.33
		Net photosynthetic tate	Stomatal conductance	IntercellularCO2 concentration	Transpiration rate
		μmol·m-2·s-1	mmol·m-2·s-1	‰	mmol·m-2·s-1
