# Supplementary material for: Microbial fungicides can positively affect aubergine photosynthetic properties, soil enzyme activity and microbial community structure
Source: PeerJ. 2024 Jun 28;12:e17620. doi: 10.7717/peerj.17620 (PMC11216198; doi:10.7717/peerj.17620)
Supplement: Supplemental Information 10 [file peerj-12-17620-s010.xls]

## Sheet: Sheet1
	abundance-based coverage estimator		Ⅰ	Ⅱ	Ⅲ
	QZ_CK		318.244	328.386	308.008
	QZ_T1		329.402	339.818	318.417
	QZ_T2		373.163	393.12	350.429
	QZ_T3		357.902	377.57	335.926
	QZ_T4		347.753	337.465	355.93
	QZ_T5		365.23	386.149	344.151
	Chao1 index		Ⅰ	Ⅱ	Ⅲ
	QZ_CK		321.413	330.755	312.032
	QZ_T1		330.81	350.303	310.563
	QZ_T2		371.181	360.725	380.616
	QZ_T3		356.567	375.996	335.737
	QZ_T4		346.867	366.349	326.884
	QZ_T5		364.222	373.732	354.296
	Shannon-Wiener index		Ⅰ	Ⅱ	Ⅲ
	QZ_CK		2.34118	3.64727	3.15608
	QZ_T1		2.01956	3.44677	2.21286
	QZ_T2		2.48762	3.47227	2.8195
	QZ_T3		3.66954	4.33105	3.2332
	QZ_T4		2.77506	3.97353	3.13729
	QZ_T5		3.17324	3.71702	3.4473
	Simpson index		Ⅰ	Ⅱ	Ⅲ
	QZ_CK		0.0813218	0.141018	0.120246
	QZ_T1		0.122885	0.224157	0.250285
	QZ_T2		0.0982742	0.181646	0.0684311
	QZ_T3		0.0496048	0.0589984	0.0697948
	QZ_T4		0.0816034	0.132399	0.040284
	QZ_T5		0.0638753	0.116387	0.0585016
	Sobs index		Ⅰ	Ⅱ	Ⅲ
	QZ_CK		331.218	284.961	295.821
	QZ_T1		306.435	284.582	320.983
	QZ_T2		343.194	320.347	365.46
	QZ_T3		437.163	300.274	315.564
	QZ_T4		362.01	283.285	359.705
	QZ_T5		406.76	295.323	353.917
